# Supplementary material for: A sugar modified amphiphilic cationic nano-adjuvant ceased tumor immune suppression and rejuvenated peptide vaccine induced antitumor immunity in cervical cancer
Source: Royal Society of Chemistry journal article supplement (doi:10.1039/d2bm01715f), 2023-01-01
Supplement: d2bm01715f1.pdf [file d2bm01715f1.pdf]

Supporting Information

**Sugar modified amphiphilic cationic nano-adjuvant ceased tumor immune suppression and rejuvenated peptide vaccine induced antitumor immunity in cervical cancer**

*Adityanarayan Mohapatra<sup>a‡</sup>, Santhosh Kalash Rajendrakumar<sup>a‡</sup>, Kondareddy Cherukula<sup>a</sup>*

*Myong-Suk Park<sup>b</sup>, Sathiyamoorthy Padmanaban<sup>a</sup>, Arathy Vasukuty<sup>a</sup>, Ayeskanta Mohanty<sup>a</sup>,*

*Jae Young Lee<sup>c</sup>, Woo Kyun Bae<sup>b</sup> and In-kyu Park<sup>a\*</sup>*

<sup>a</sup>Department of Biomedical Science and BK21 PLUS Center for Creative Biomedical Scientists  
at Chonnam National University, Chonnam National University Medical School,

Gwangju 61469, Republic of Korea.

<sup>b</sup>Department of Hematology-Oncology, Chonnam National University Medical School,

Gwangju, 61469, South Korea.

<sup>c</sup>School of Materials Science and Engineering, Gwangju Institute of Science and Engineering,

Gwangju 61005, Korea.

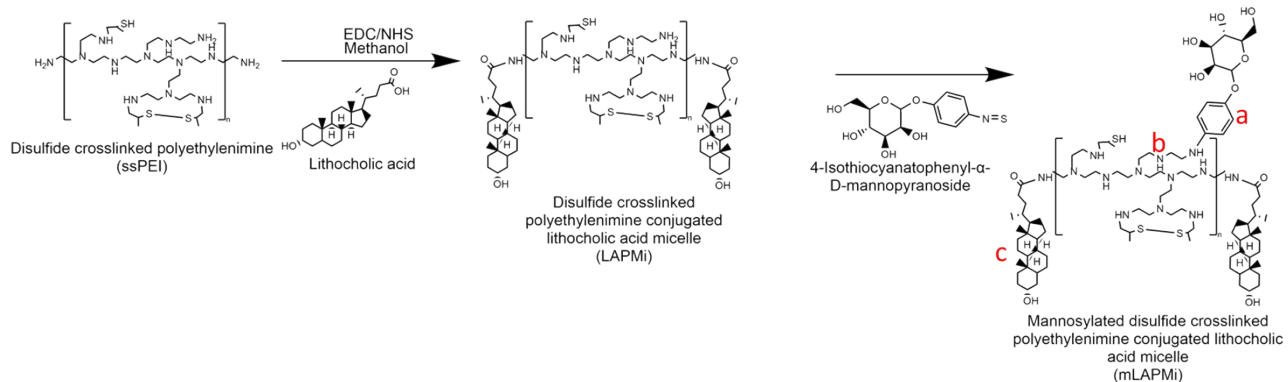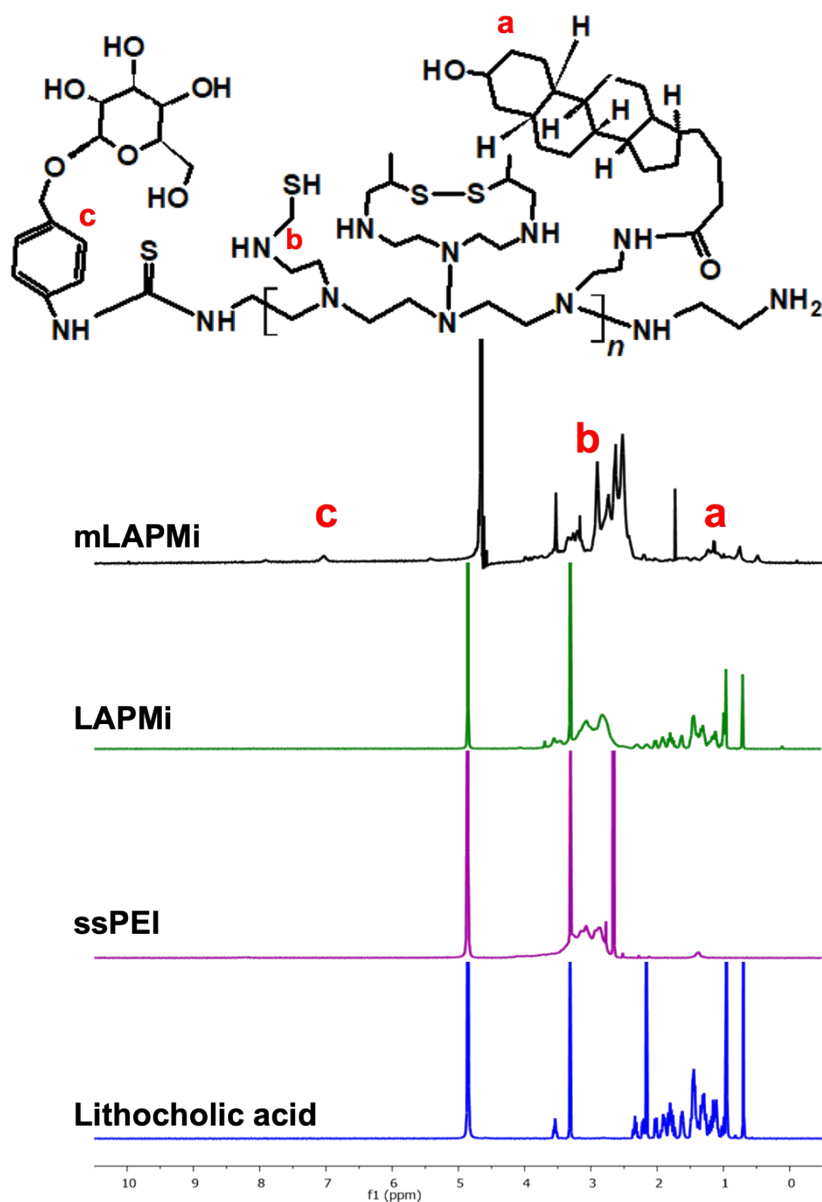

Figure S1: Schematic representation of mLAPMi synthesis and NMR analysis.

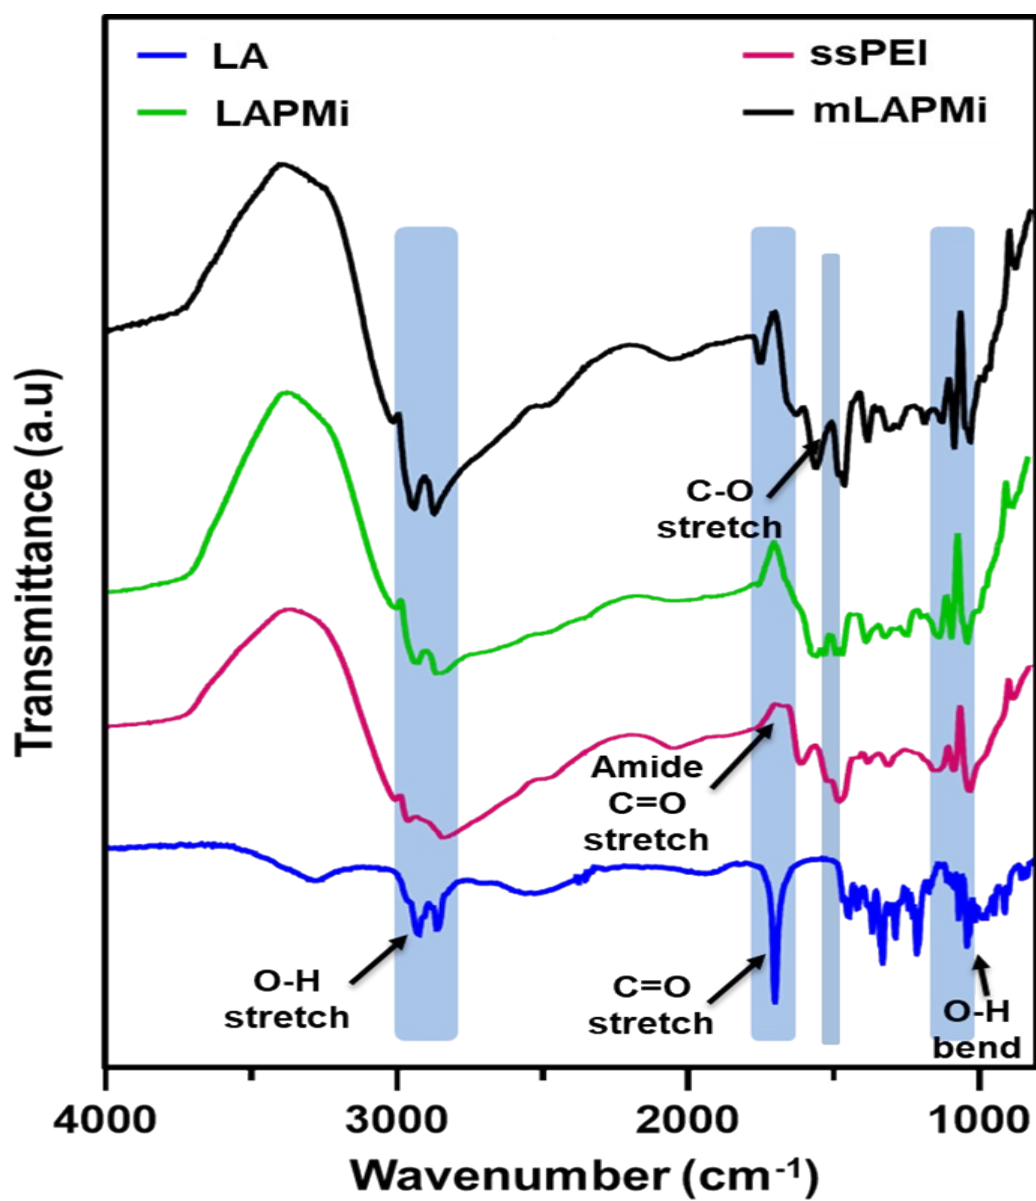

Figure S2: FTIR analysis of mLAPMi.

| Sample | [LAPMi]: [Mannose] (feed ratio) | Grafting ratio % (1HNMR) |
|--------|---------------------------------|--------------------------|
| mLAPMi | 1:0.1                           | 39                       |
| mLAPMi | 1:0.2                           | 62                       |
| mLAPMi | 1:0.25                          | 65                       |

Table S1: The chemical properties of mannose conjugated ssPEI-lithocholic acid micelle (mLAPMi).

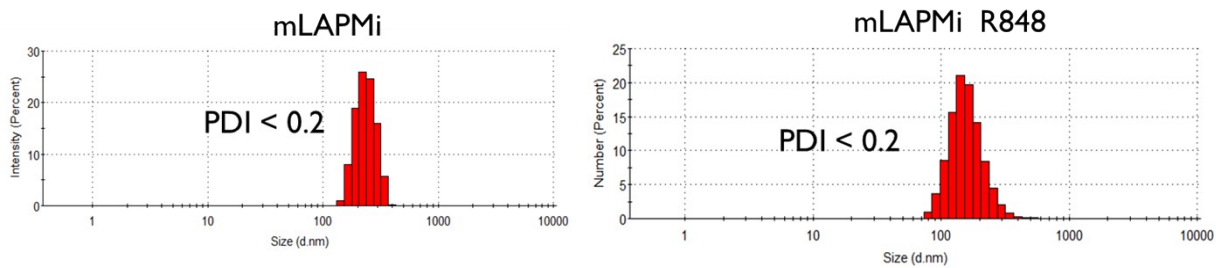

Figure S3: Dynamic light scattering analysis of mLAPMi and mLAPMi R848.

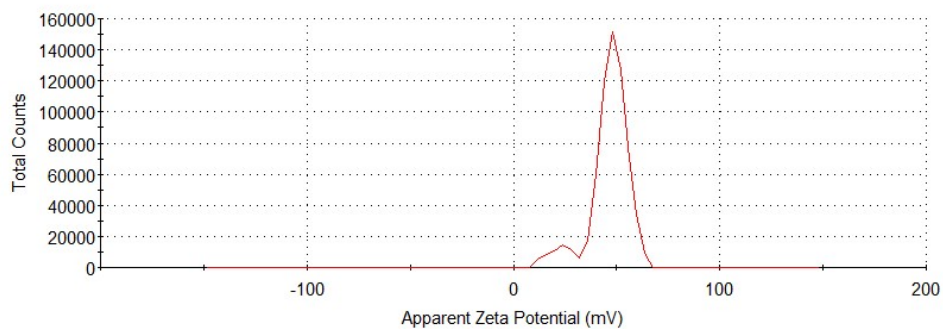

Figure S4: Zeta potential of mLAPMi-R848.

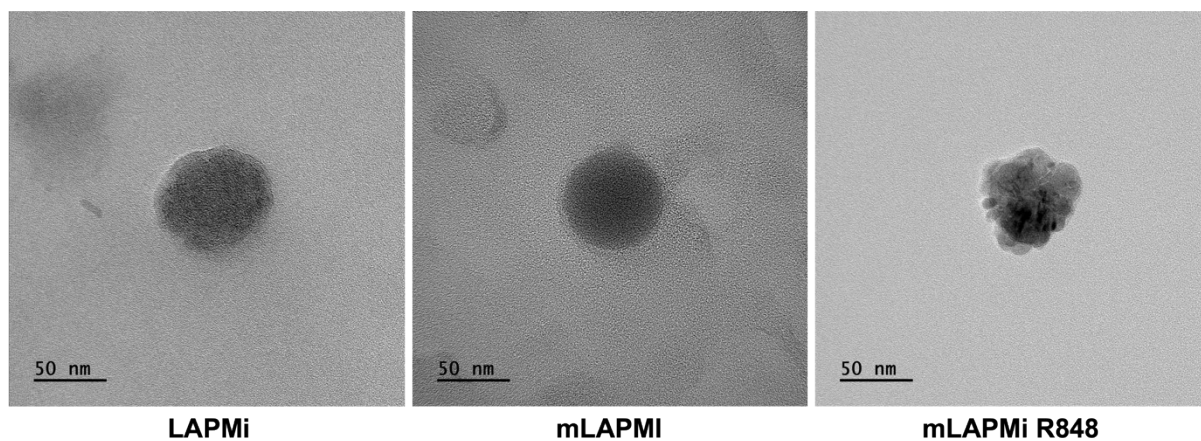

Figure S5- TEM images of mLAPMi and mLAPMi loaded with R848.

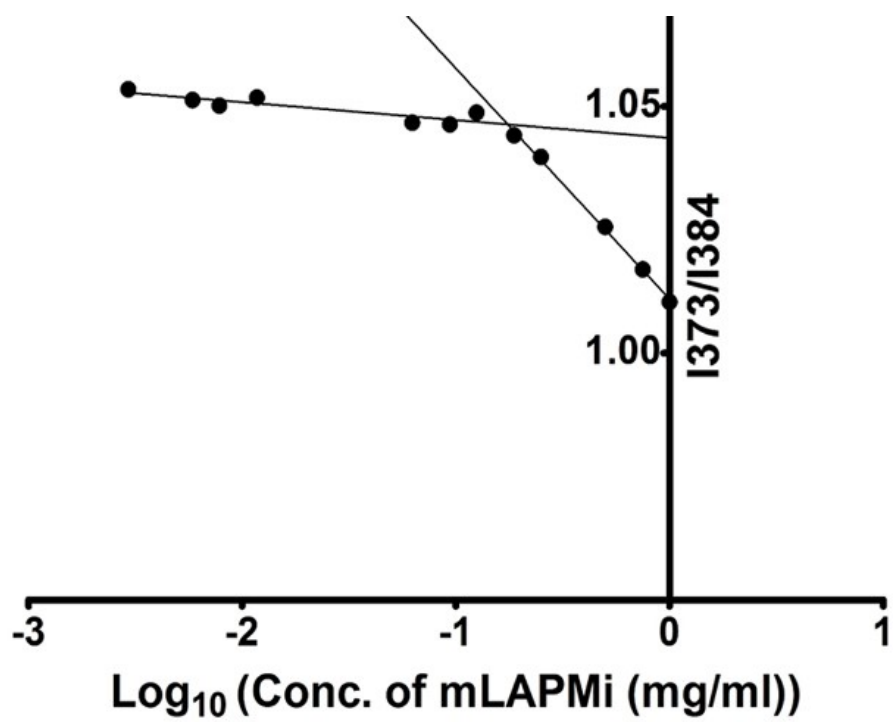

Figure S6- Critical micelle concentration of mLAPMi.

| <b>Sample</b> | <b>Feed LAPMi (mg)</b> | <b>Feed R848 (mg)</b> | <b>Amount of R848 (<math>\mu\text{g}</math>)/<br/>mg of micelle</b> | <b>Loading efficiency (%)</b> | <b>Loading content (%)</b> |
|---------------|------------------------|-----------------------|---------------------------------------------------------------------|-------------------------------|----------------------------|
| LAPMi         | 10                     | 2                     | 46.4                                                                | 22.6                          | 4.64                       |
| mLAPMi        | 10                     | 2                     | 54.2                                                                | 27.1                          | 5.42                       |

Table S2: Drug loading efficacy of mLAPMi



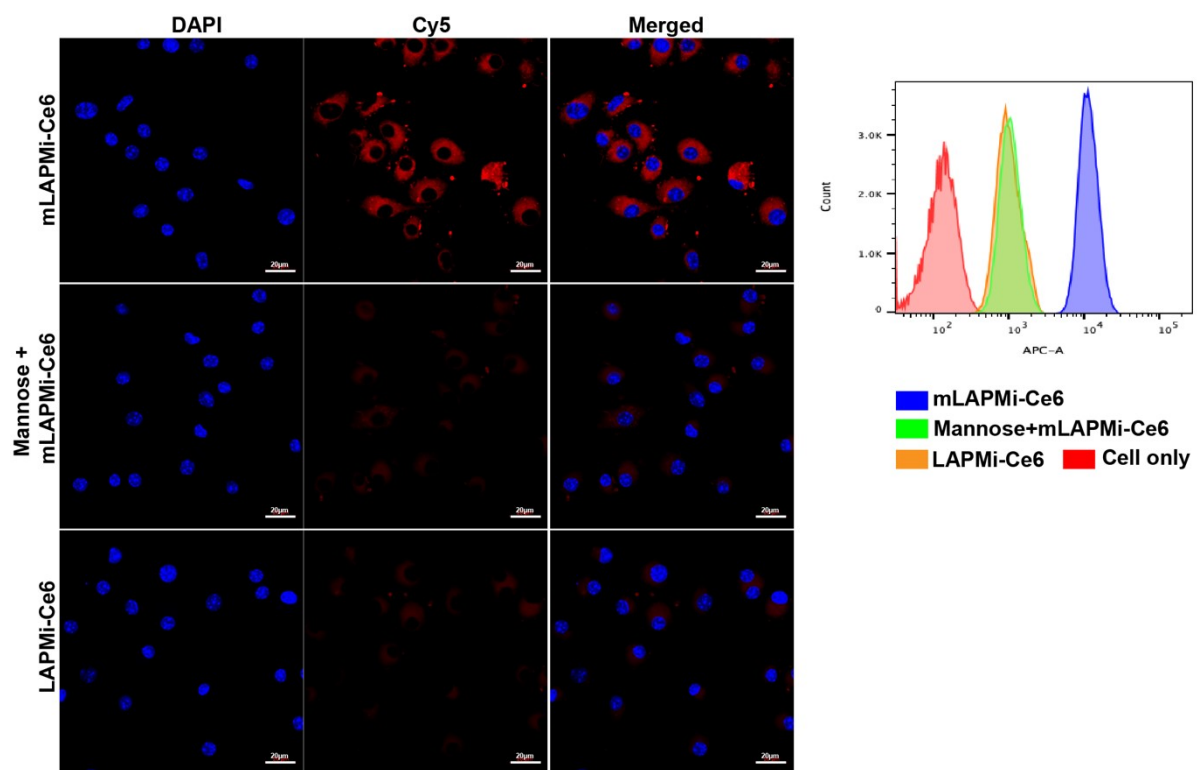

Figure S7: Intracellular uptake of mLAPMi-Ce6 in BMDCs. Scale bar is 20 μm.

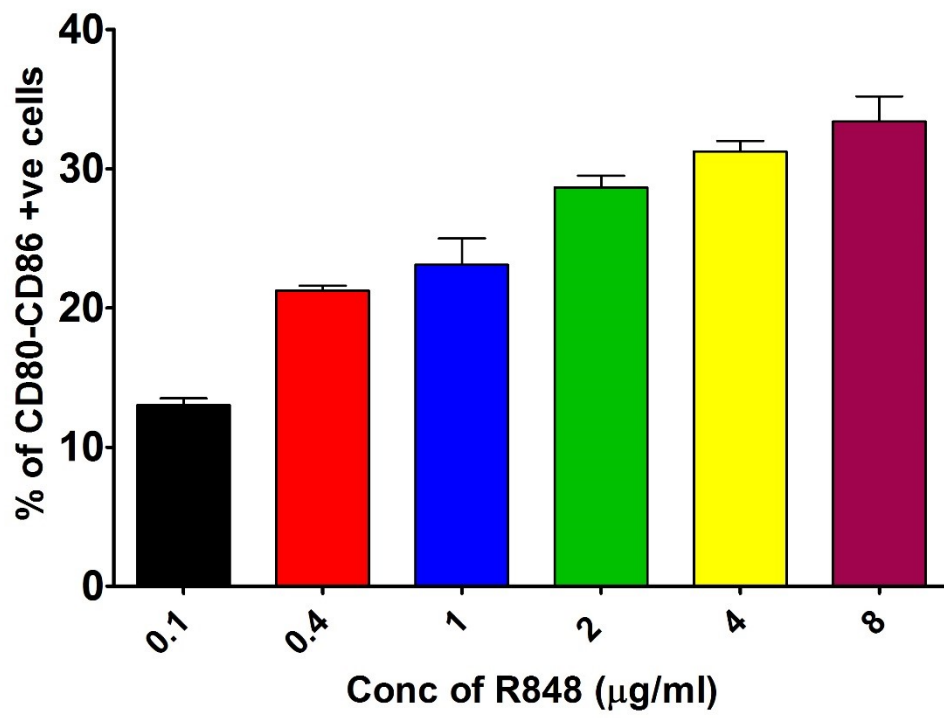

Figure S8: DC maturation in BMDCs treated with different concentration of R848.

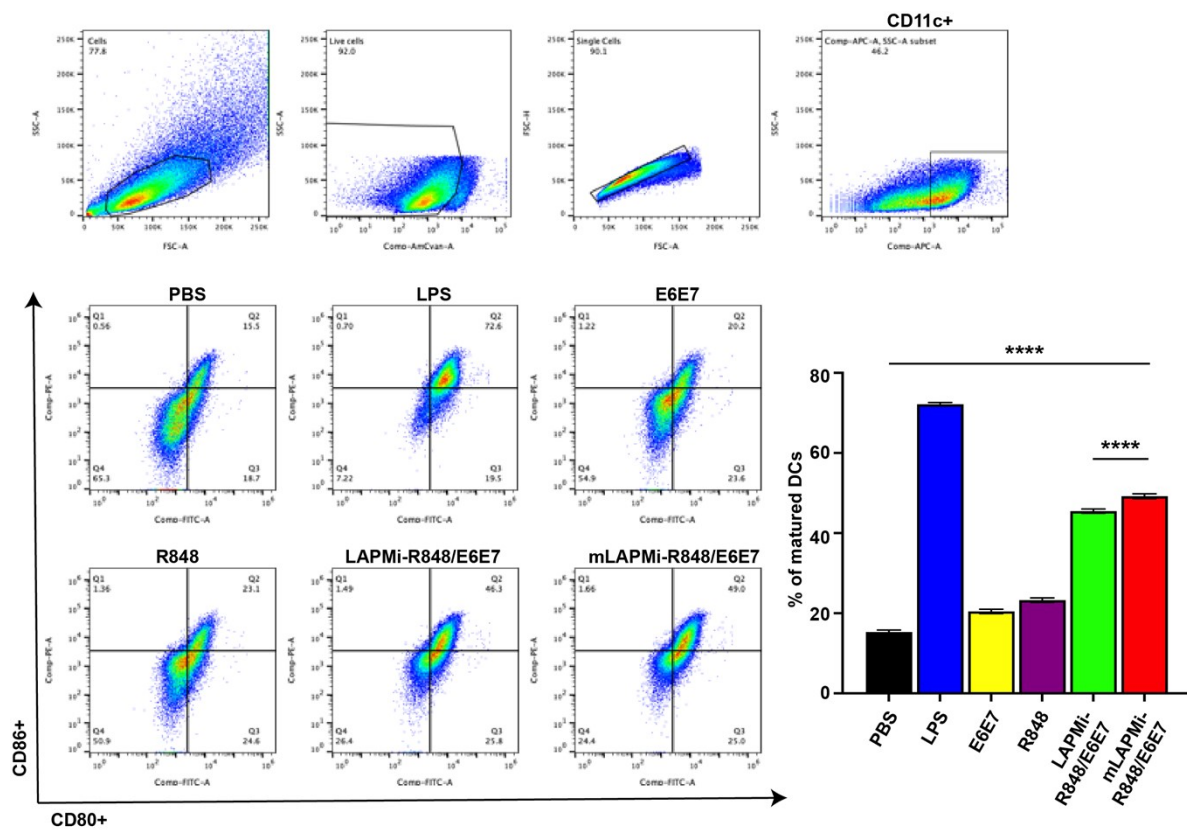

Figure S9: BMDCs maturation induced by mLAPMi-R848 nanoparticle and E6E7 peptide antigen in bone marrow derived dendritic cells, N = 4, SEM, \*\*\*\*,  $p < 0.0001$

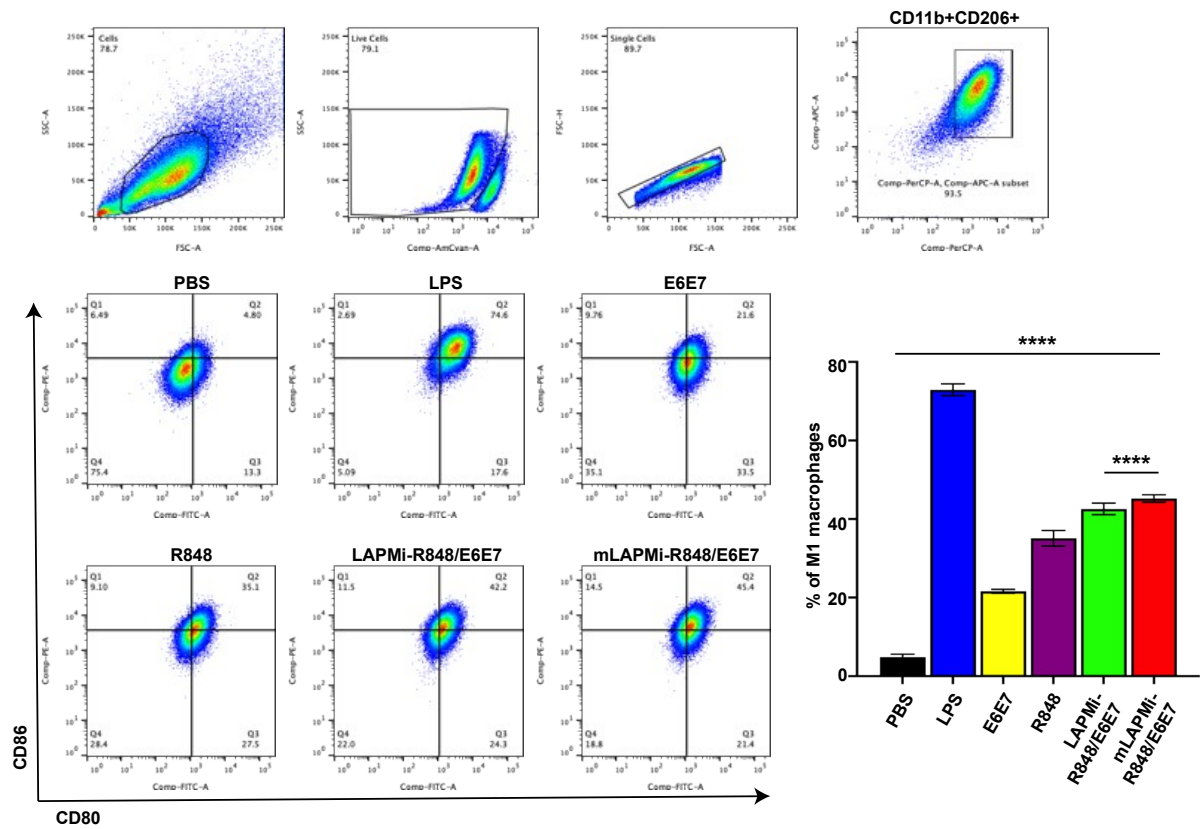

Figure S10- Macrophage polarization by mLAPMI-R848 nanoparticle and E6E7 peptide antigen in IL-4 induced M2 polarized J774A.1 macrophage cell lines. N = 4, SEM \*\*\*\*,  $p < 0.0001$ .

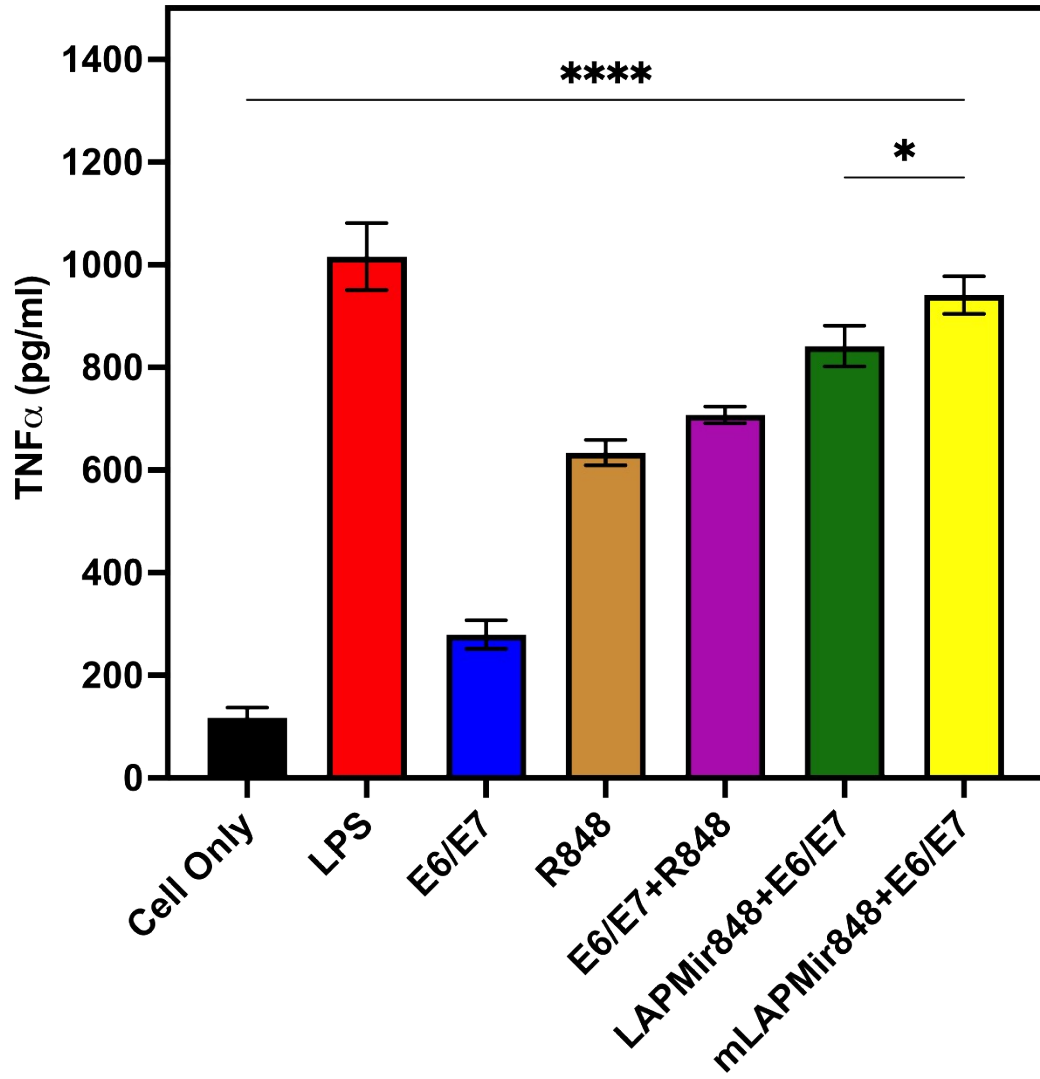

Figure S11: ELISA analysis of TNF $\alpha$  secreted from mLAPMi-R848 treated BMDCs. n=3, SEM, \*\*\*\*p<0.0001.

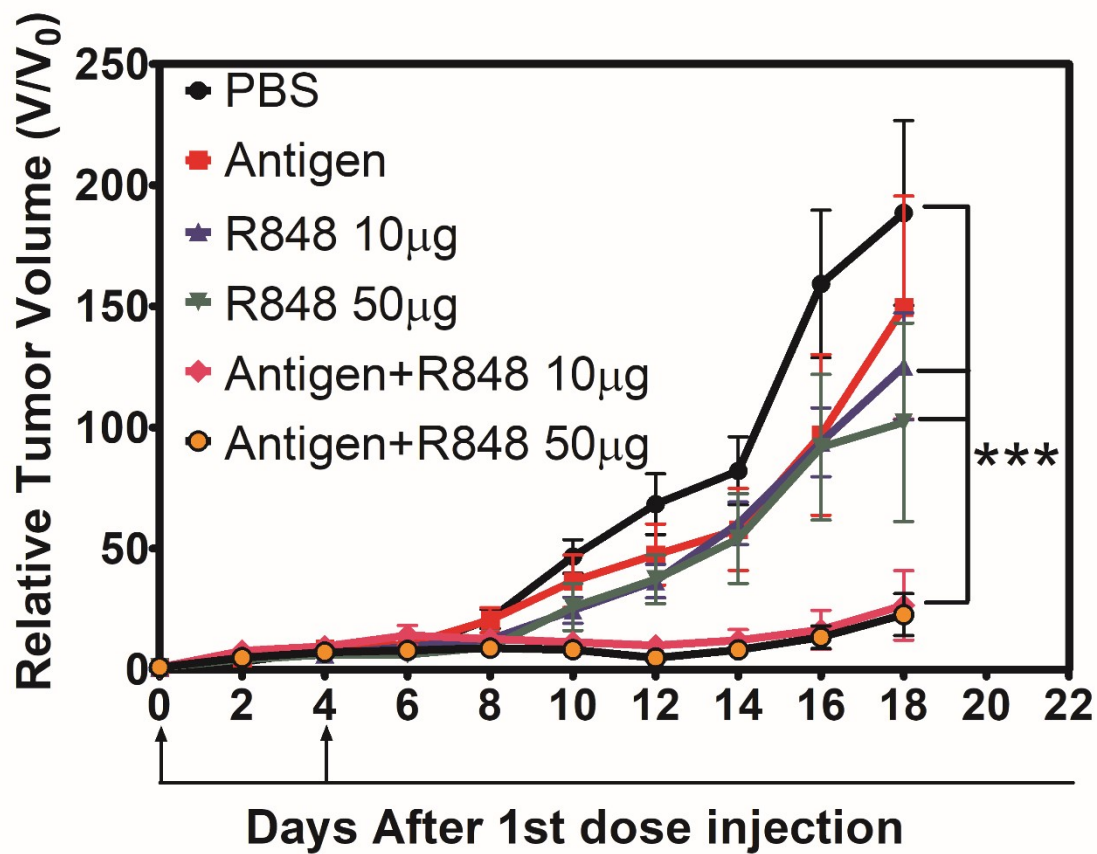

Figure S12: Antitumor effect of different dose of R848 in TC-1 tumor model. 10  $\mu$ g is equivalent to 0.5 mg/kg, 50 $\mu$ g is equivalent to 2.5 mg/kg. n=5, SEM, \* $p$ <0.05, \*\*\* $p$ <0.001.

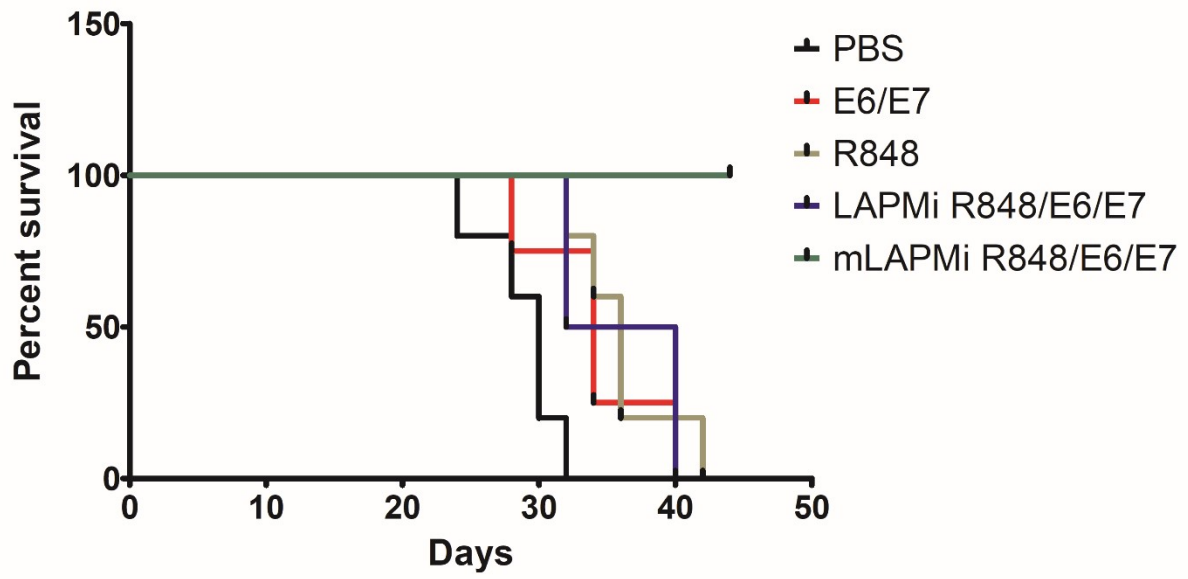

Figure S13: Survival rate of TC-1 tumor mice administered with mLAPMi-R848 and E6E7 peptide.

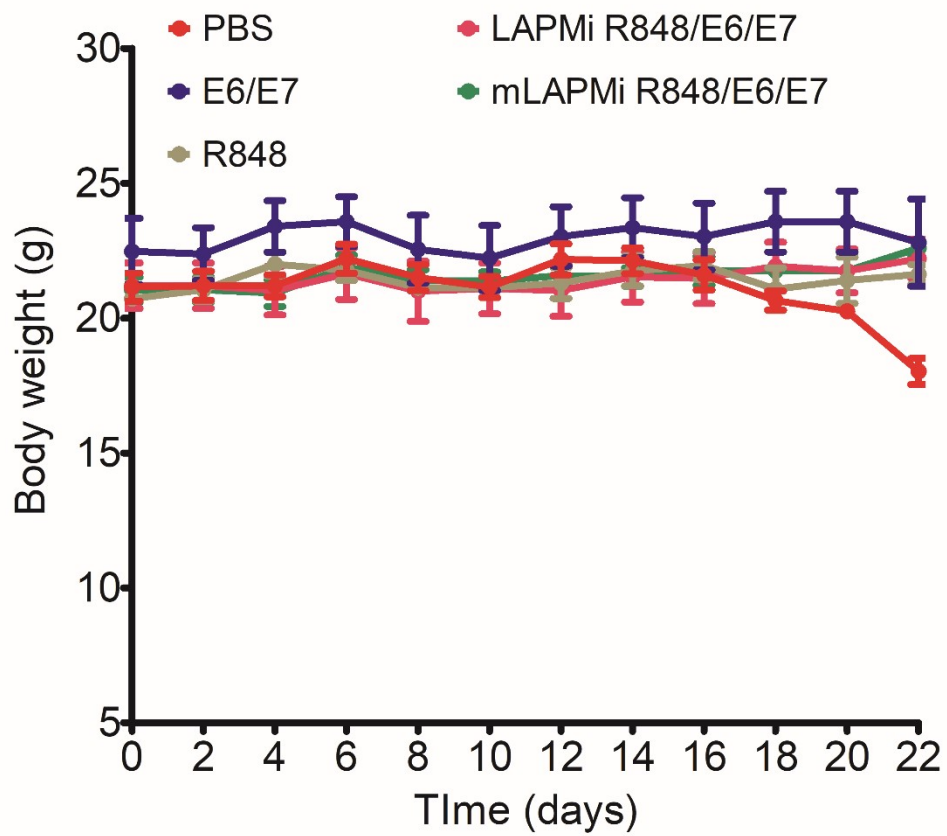

Figure S14: Body mass of TC-1 tumor mice administered with mLAPMi-R848 and E6E7 peptide.



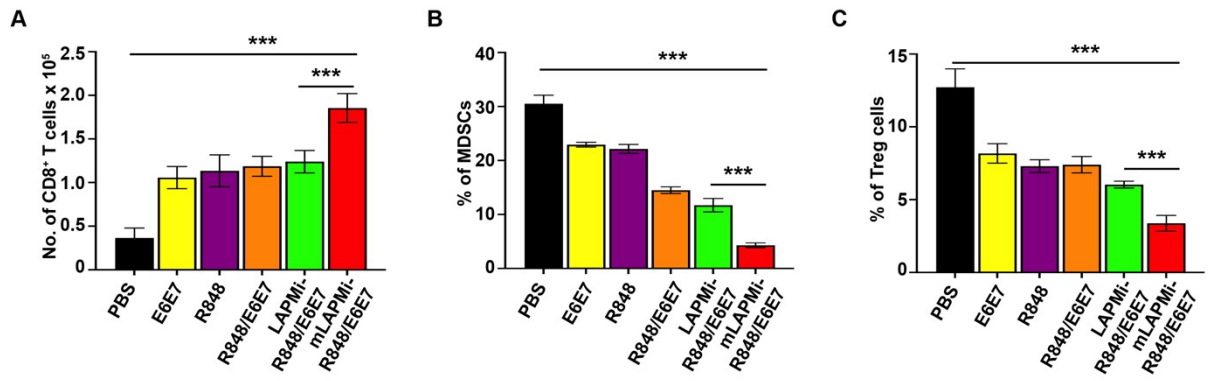

Figure S15: Immune phenotyping of cells isolated from primary tumor of mLAPMi-R848 and E6E7 peptide antigen vaccinated TC-1 tumor mice. A) Absolute numbers of CD8<sup>+</sup> T cells (gated with CD3<sup>+</sup>CD8<sup>+</sup>), B) MDSCs (gated with CD11b<sup>+</sup> Ly6g & Ly6cGR-1<sup>+</sup>) C) Tregs (gated with CD4<sup>+</sup>CD25<sup>+</sup>FoxP3<sup>+</sup>). N=4, \*\*\*p<0.001.

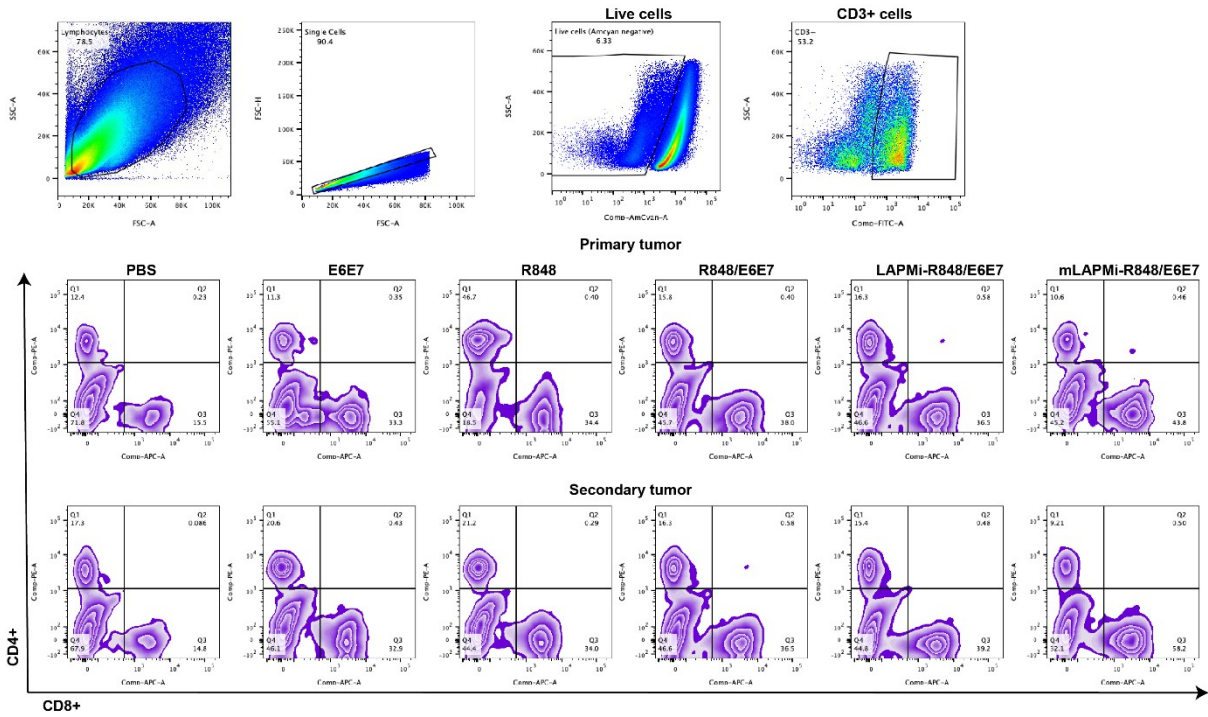

Figure S16: Gating strategy of CD8+ T cells isolated from the both primary and secondary tumors in mLAPMI-R848/E6E7 treated bilateral tumor model.

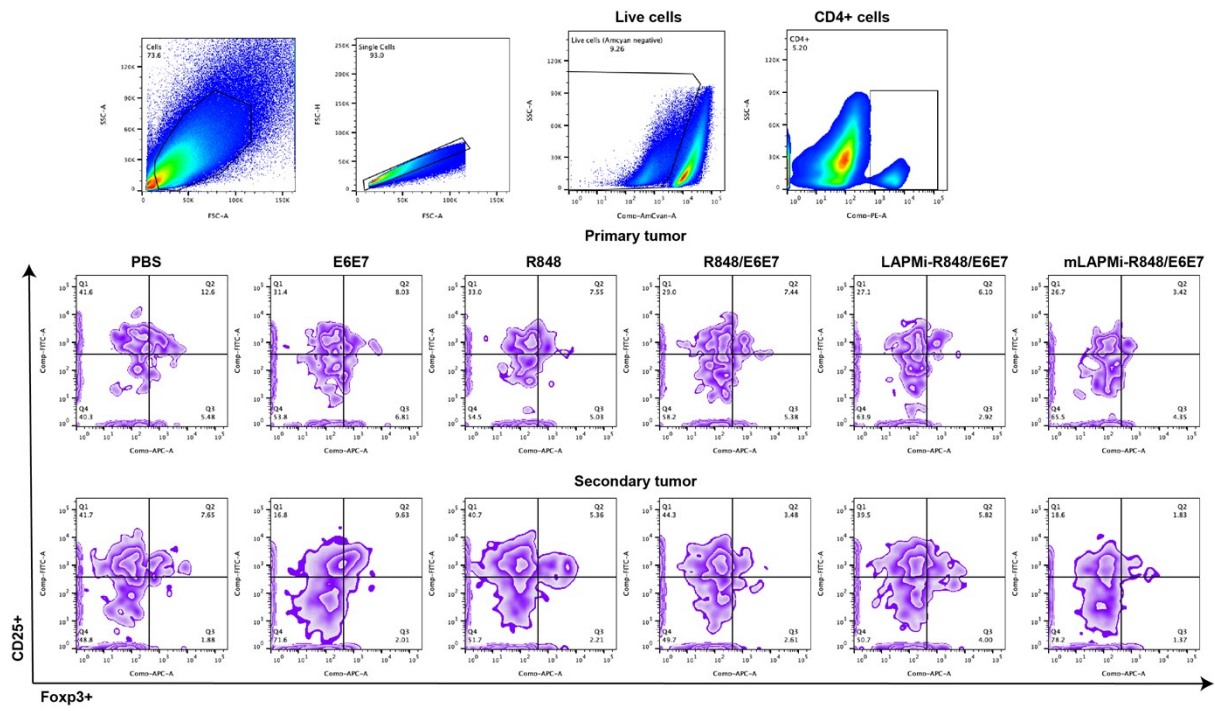

Figure S17: Gating strategy of Treg cells isolated from the both primary and secondary tumors in mLAPMI-R848/E6E7 treated bilateral tumor model.

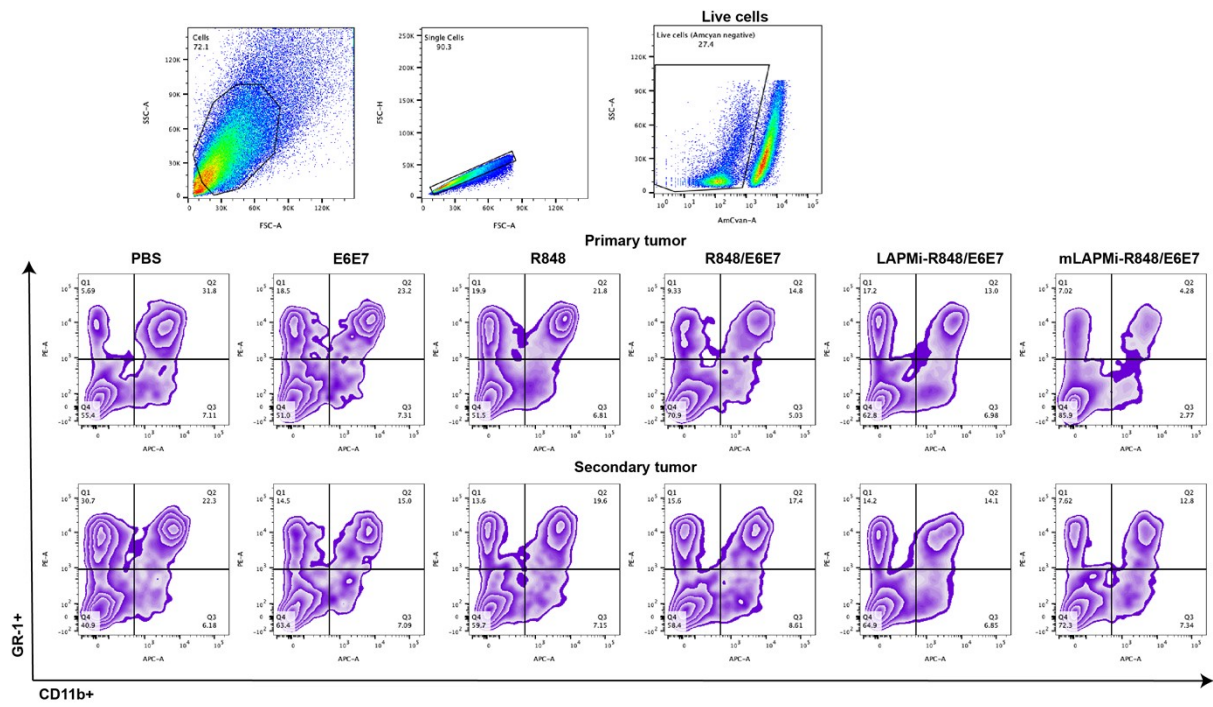

Figure S18: Gating strategy of MDSCs isolated from the both primary and secondary tumors in mLAPMI-R848/E6E7 treated bilateral tumor model.
